# Supplementary material for: Mannose receptor interacts with Fc receptors and is critical for the development of crescentic glomerulonephritis in mice
Source: JCI journal article supplement (doi:10.1172/jci41560), 2010-04-20

## Figure 1

(A) Expression of MR in the kidney of a pre-immunised WT mouse prior to induction of nephrotoxic nephritis and (B) 72 hours following injection of nephrotic serum demonstrating the predominant glomerular (mesangial pattern) staining prior to disease induction and a periglomerular distribution 72 hours later( both x400)

A

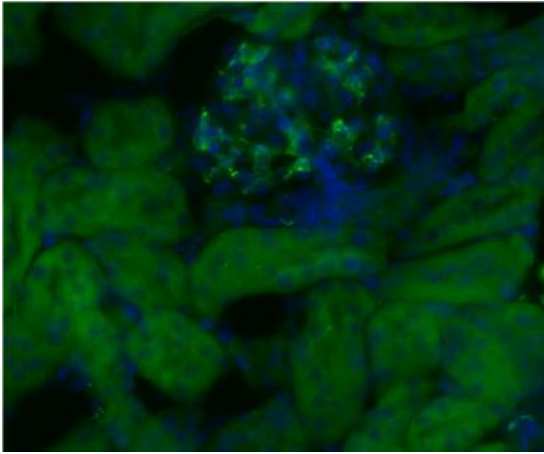

B

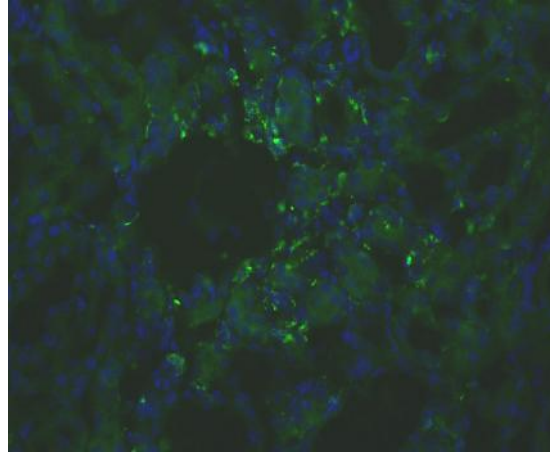

**Figure 2**  
Circulating mouse anti-sheep IgG immunoglobulin isotypes from WT and *Mr*<sup>-/-</sup> mice with nephrotoxic nephritis; **A)** IgG1, **B)** IgG2a, **C)** IgG2b, and **D)** IgG3 demonstrating no significant differences in humoral responses between WT and *Mr*<sup>-/-</sup> mice.

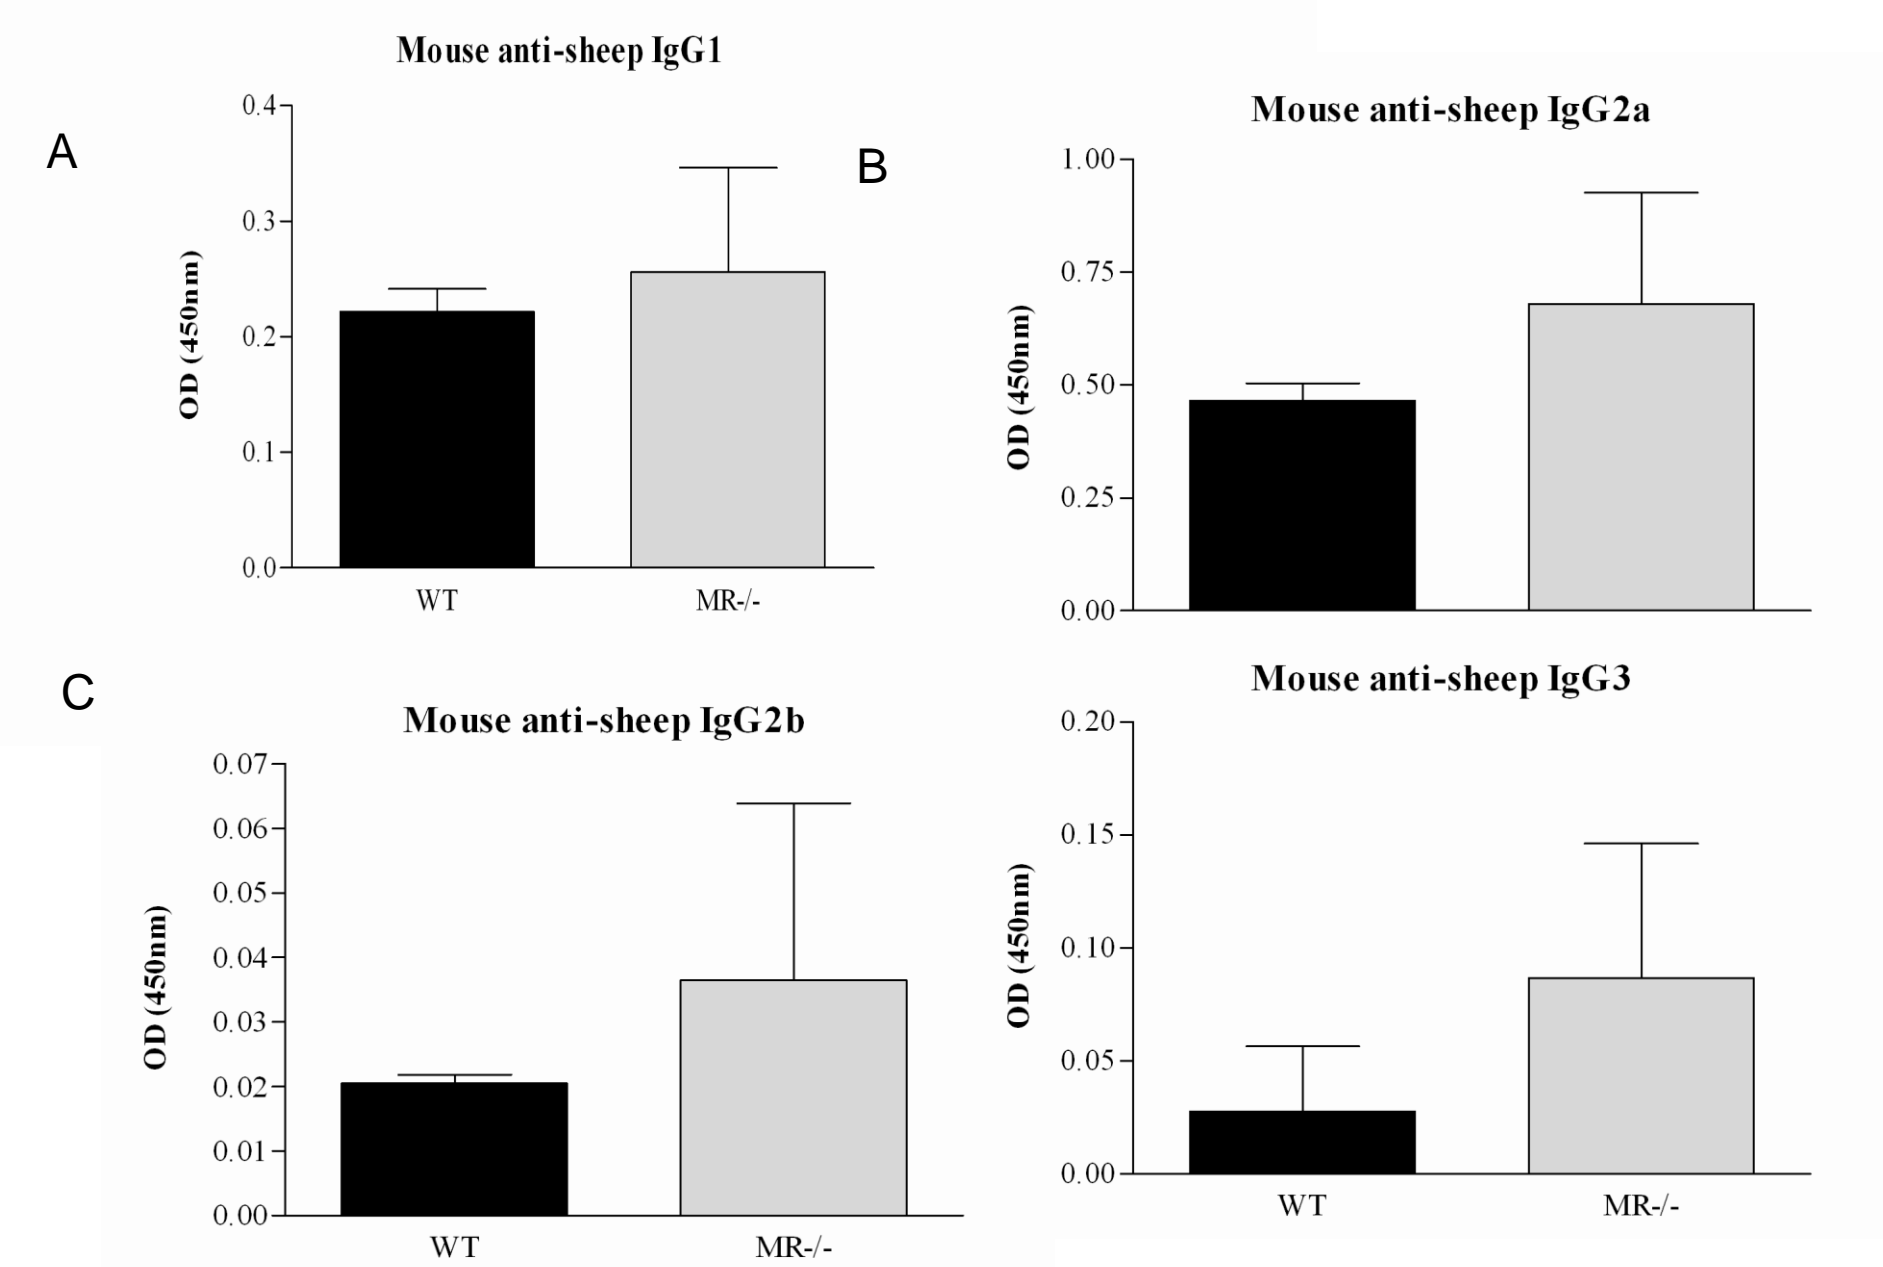

**Figure 3**  
(A) Delayed type hypersensitivity responses in WT and *Mr*<sup>-/-</sup> mice with nephrotoxic nephritis assessed by change in skin thickness following challenge with PBS or sheep IgG. No differences were found between the responses in WT or *Mr*<sup>-/-</sup> mice.  
(B) Levels of IL-17A in the supernatants of CD4<sup>+</sup> T cells from pre-immunised WT or *Mr*<sup>-/-</sup> mice stimulated with CD3/CD28 microbeads demonstrating no significant difference in cytokine production.

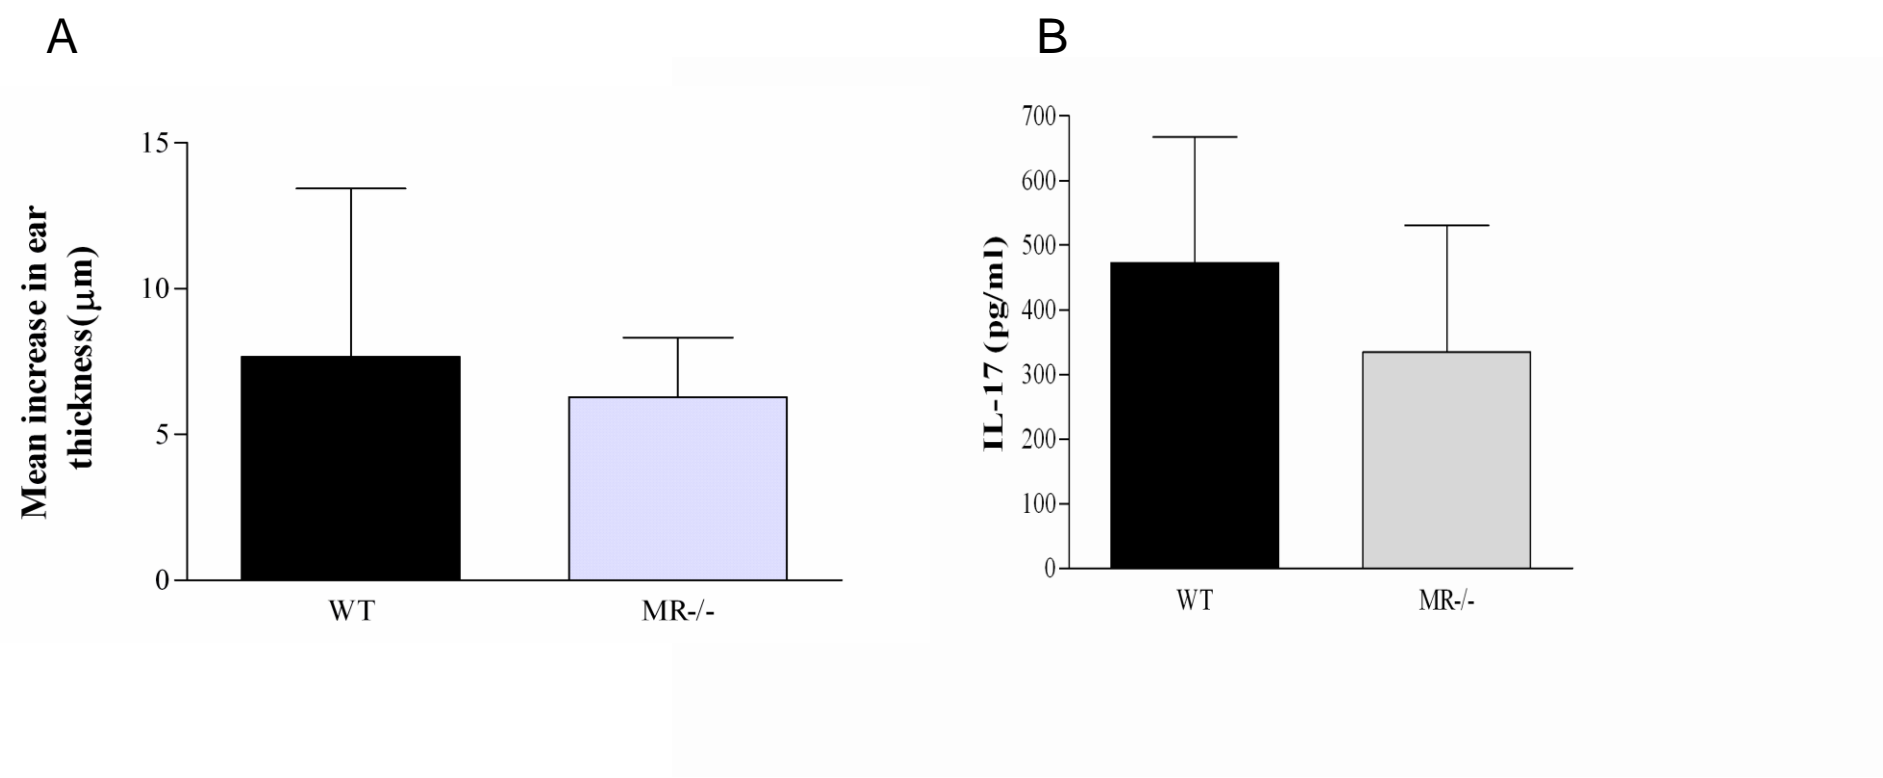

**Figure 4**  
MALDI-TOF profiles of permethylated N-glycans released from IgG sample by PNGase F digestion. **(A)** is IgG from WT mice with NTN and **(B)** is IgG from *Mr*<sup>-/-</sup> with NTN. Sugar symbols: yellow circle, Gal; green circle, Man; blue square, GlcNAc; red triangle, Fuc; blue diamond, NeuGc

A

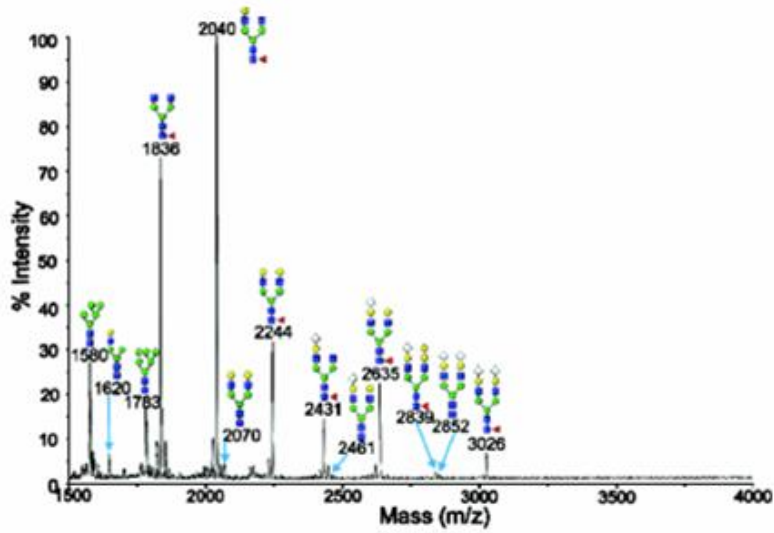

B

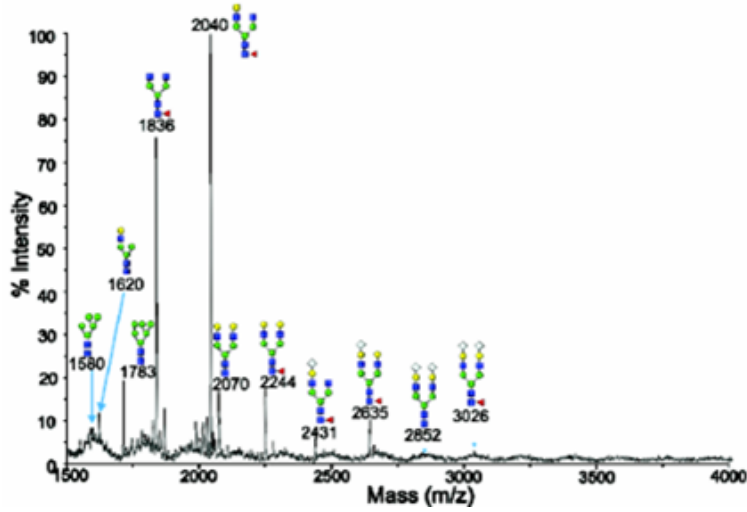

**Figure 5**  
Apoptosis of mesangial cells from **(A)** WT (x400) and **(B)** *Mr*<sup>-/-</sup> (x200) mice assessed by Hoechst dye exclusion, confirming the increased apoptotic rate in mesangial cells, demonstrated by the condensed nuclear material and apoptotic bodies highlighted by yellow arrows.

A

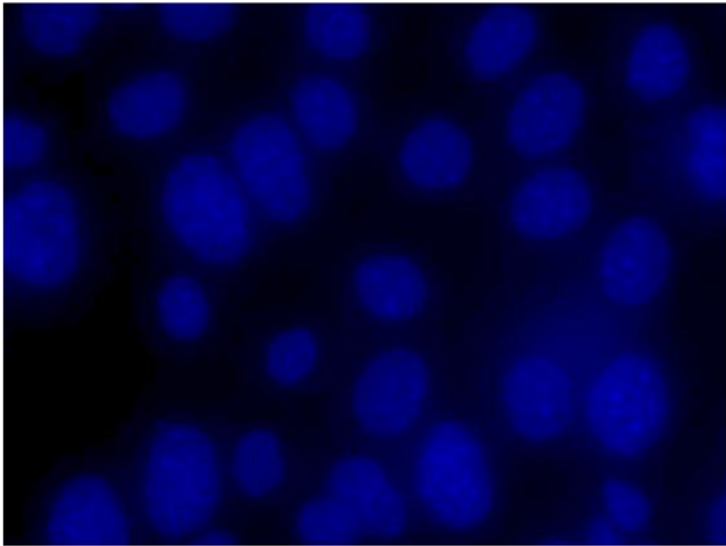

B

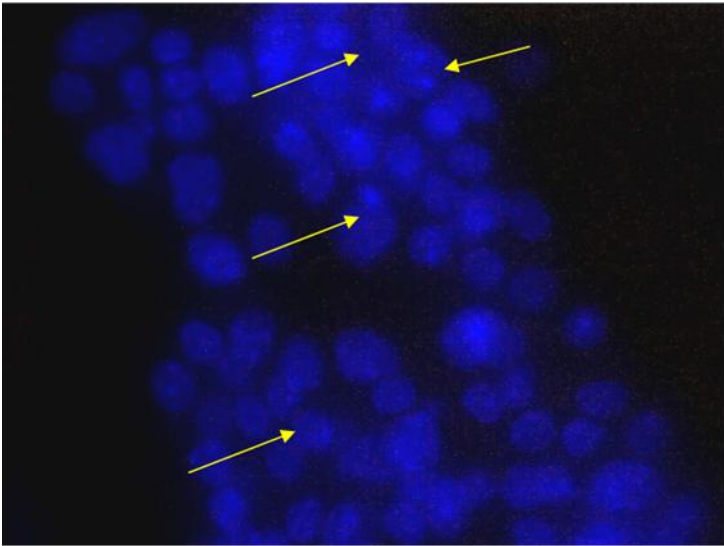

**Figure 6**  
TNF- $\alpha$  production from WT and *Mr*<sup>-/-</sup> macrophages stimulated with differing concentrations of LPS for 2 hours, measured by ELISA on cell supernatants.

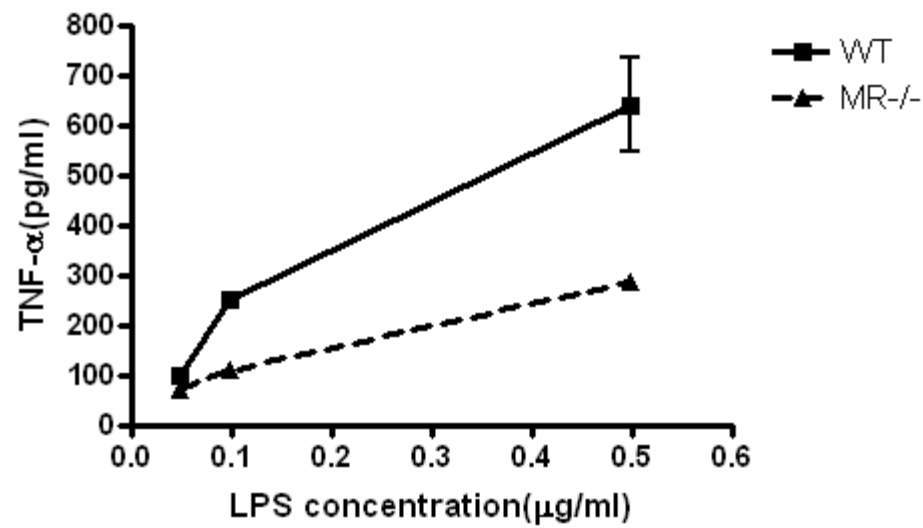

Supplement: sd1 [file 1]
